# Supplementary material for: Biochar and/or Compost to Enhance Nursery-Produced Seedling Performance: A Potential Tool for Forest Restoration Programs
Source: MDPI journal article supplement (doi:10.3390/f13040550), 2022-03-31
Supplement: s1 [file s1]

## Supplementary Materials

**Table S1. Seasonal changes during experimental trial.** Minimum, maximum, and average temperature values in the 12 months of experimentation - from T0 (July) to T12 (July).

| Month     | T mean max (°C) | T mean min (°C) | T mean (°C) |
|-----------|-----------------|-----------------|-------------|
| July      | 26,1            | 13,1            | 19,6        |
| August    | 28,3            | 13,5            | 20,7        |
| September | 24,2            | 11,9            | 17,6        |
| October   | 21,1            | 9,0             | 14,5        |
| November  | 17,5            | 5,3             | 10,5        |
| December  | 11,0            | 0,8             | 5,2         |
| January   | 9,8             | -0,2            | 4,8         |
| February  | 9,5             | 0,7             | 4,9         |
| March     | 12,8            | 3,5             | 8,1         |
| April     | 17,4            | 4,5             | 10,9        |
| May       | 23,2            | 8,8             | 16,0        |
| June      | 26,9            | 10,8            | 18,8        |
| July      | 32,6            | 15,1            | 23,6        |
